# Supplementary material for: The amphioxus (Branchiostoma floridae) genome contains a highly diversified set of G protein-coupled receptors
Source: PubMed Central journal article supplement (PMC2246102; doi:10.1186/1471-2148-8-9), 2008-01-16
Supplement: 1471-2148-8-9-S1.pdf [file 1471-2148-8-9-S1.pdf]

### **Additional file 1– Neighbor-joining trees**

All trees were made with MEGA using sequences cut with the TM-domain from the reference set as model. The sequences were aligned with the ClustalW-algorithm and the standard parameters used in the batch mode variant. The trees are neighbor-joining trees that were bootstrapped 500 times. The bootstrap values in the trees are given in percent. The annotation after the sequence name contains information about the sequence, such as doublets and domain hits. The domains are given with their Pfam id (i.e. 7tm\_1 for the *Rhodopsin* family transmembrane domain). The xN (ie x2) always refers to the object close before it. If it is directly after the name it denotes the number of copies of the sequence and if it is after a domain name it stands for the number of hits with that domain. Domain searches were made with the HMMER package and the Pfam library of local domains (Pfam\_ls). An e-value cutoff at 0.01 were applied.

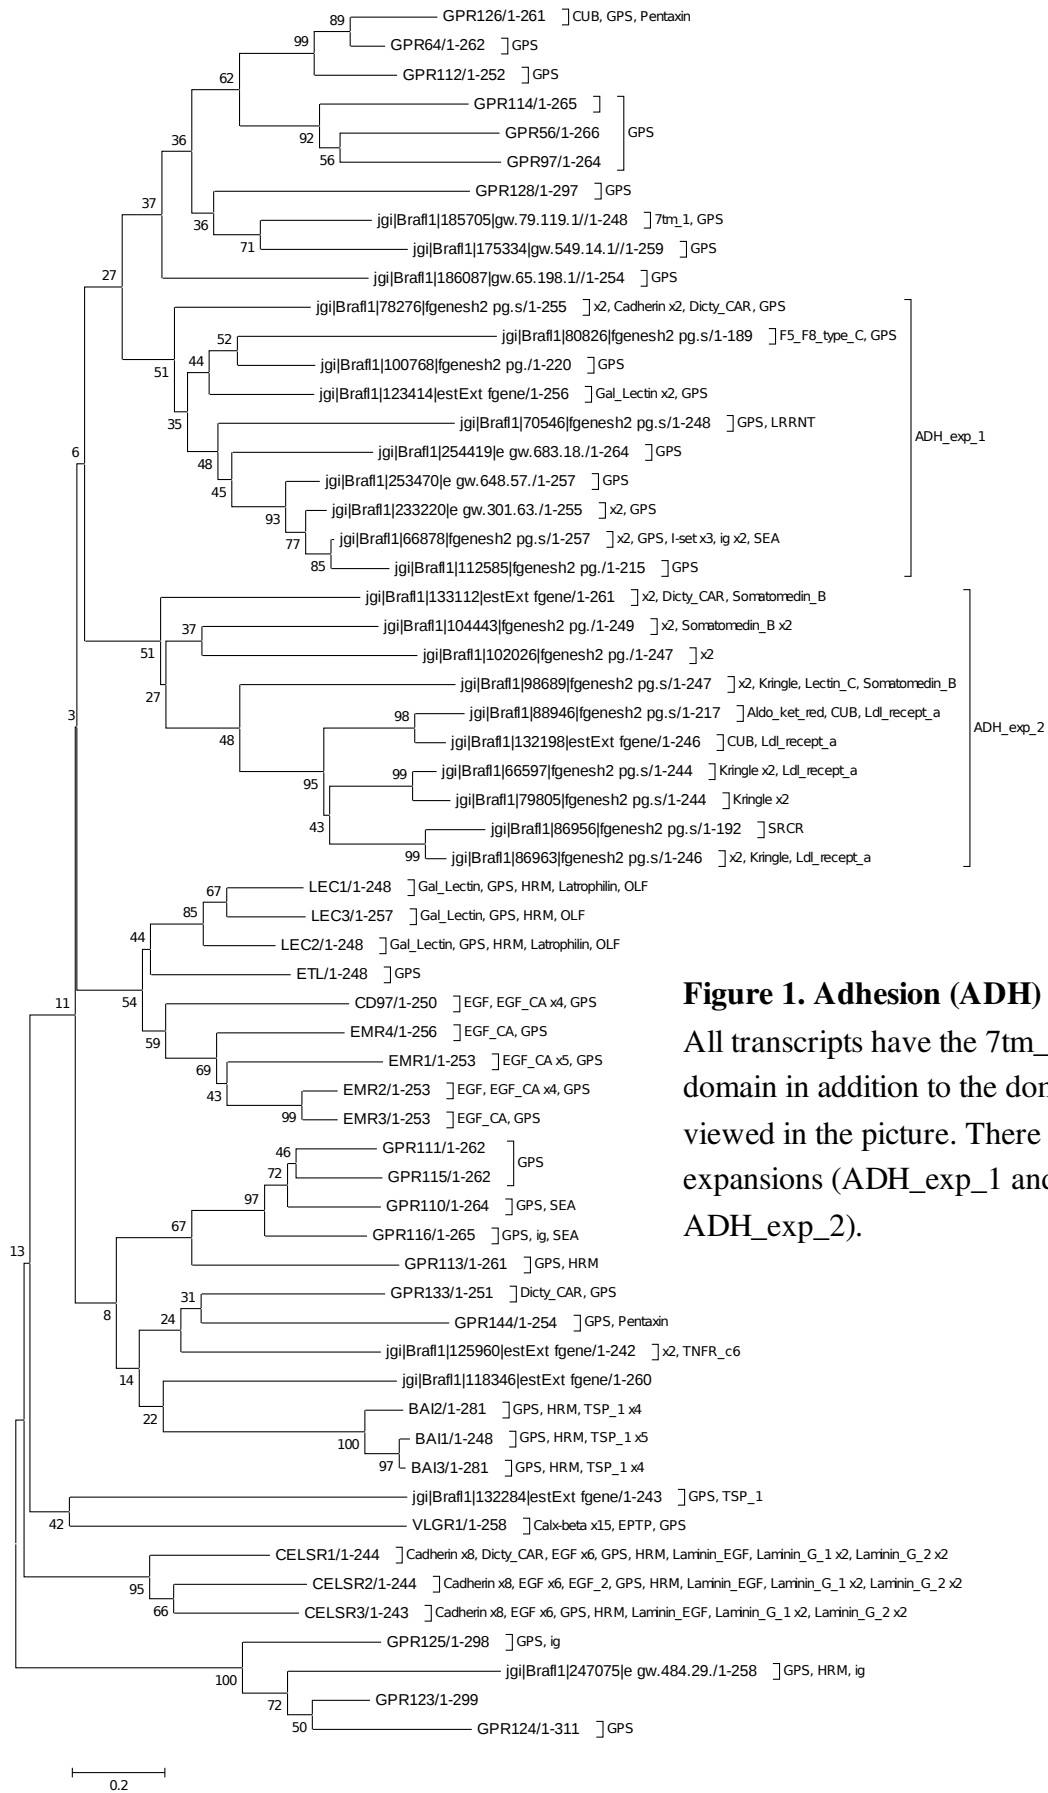

**Figure 1. Adhesion (ADH)**  
 All transcripts have the 7tm\_2 domain in addition to the domains viewed in the picture. There are two expansions (ADH\_exp\_1 and ADH\_exp\_2).

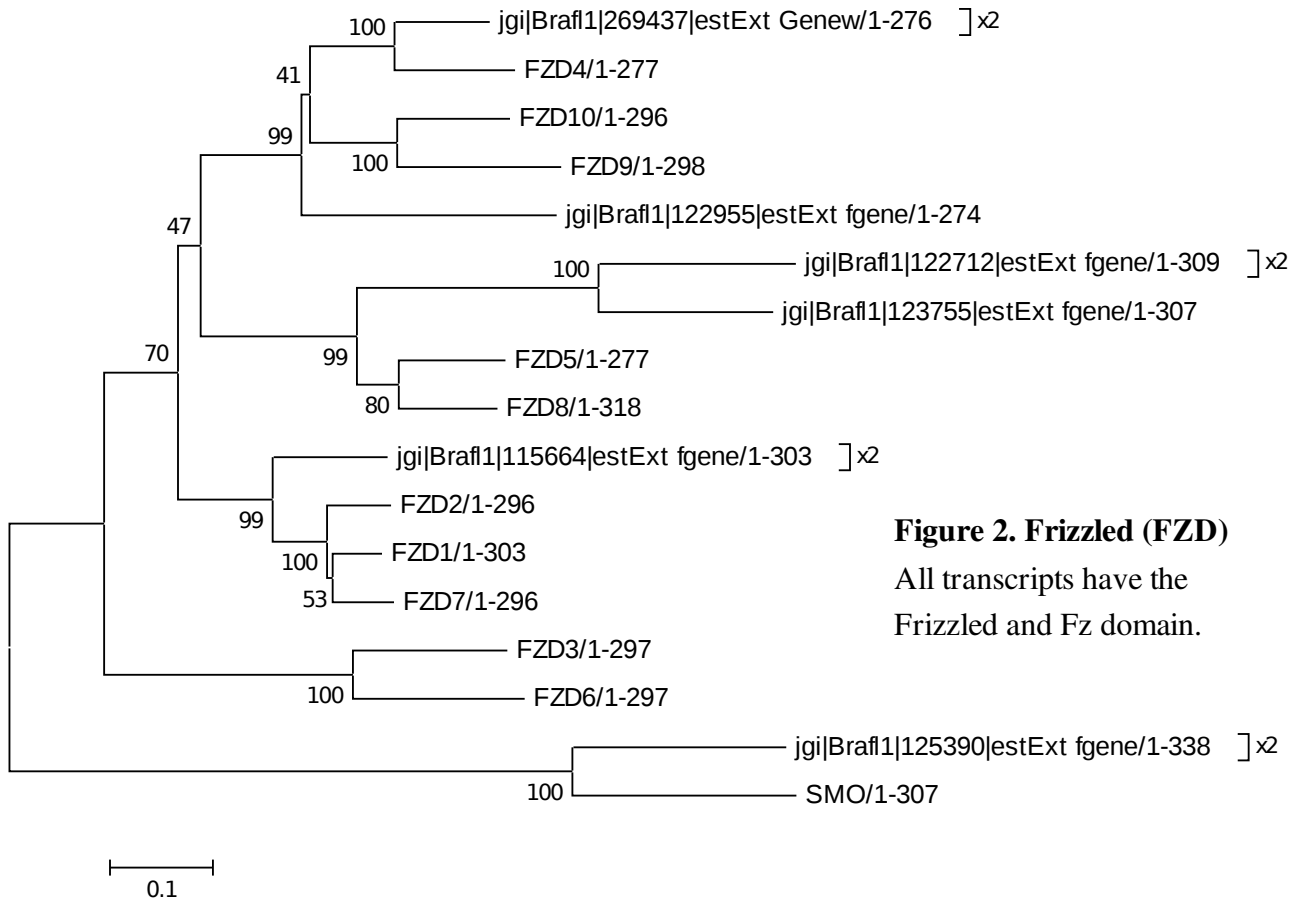

**Figure 2. Frizzled (FZD)**

All transcripts have the Frizzled and Fz domain.

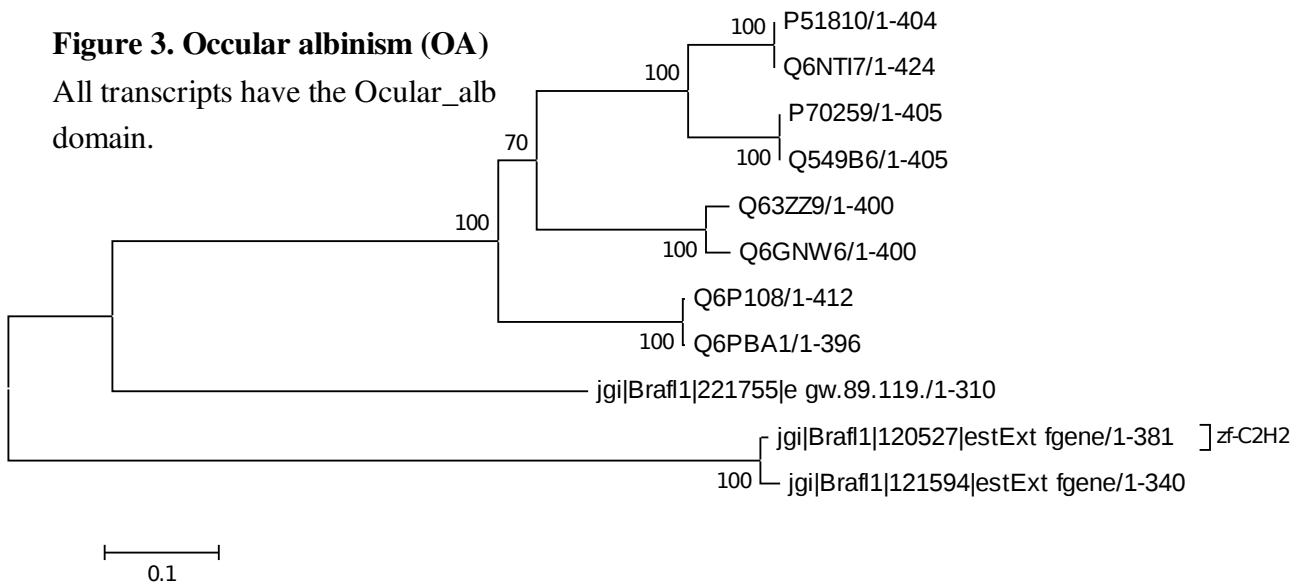

**Figure 3. Ocular albinism (OA)**

All transcripts have the Ocular\_alb domain.

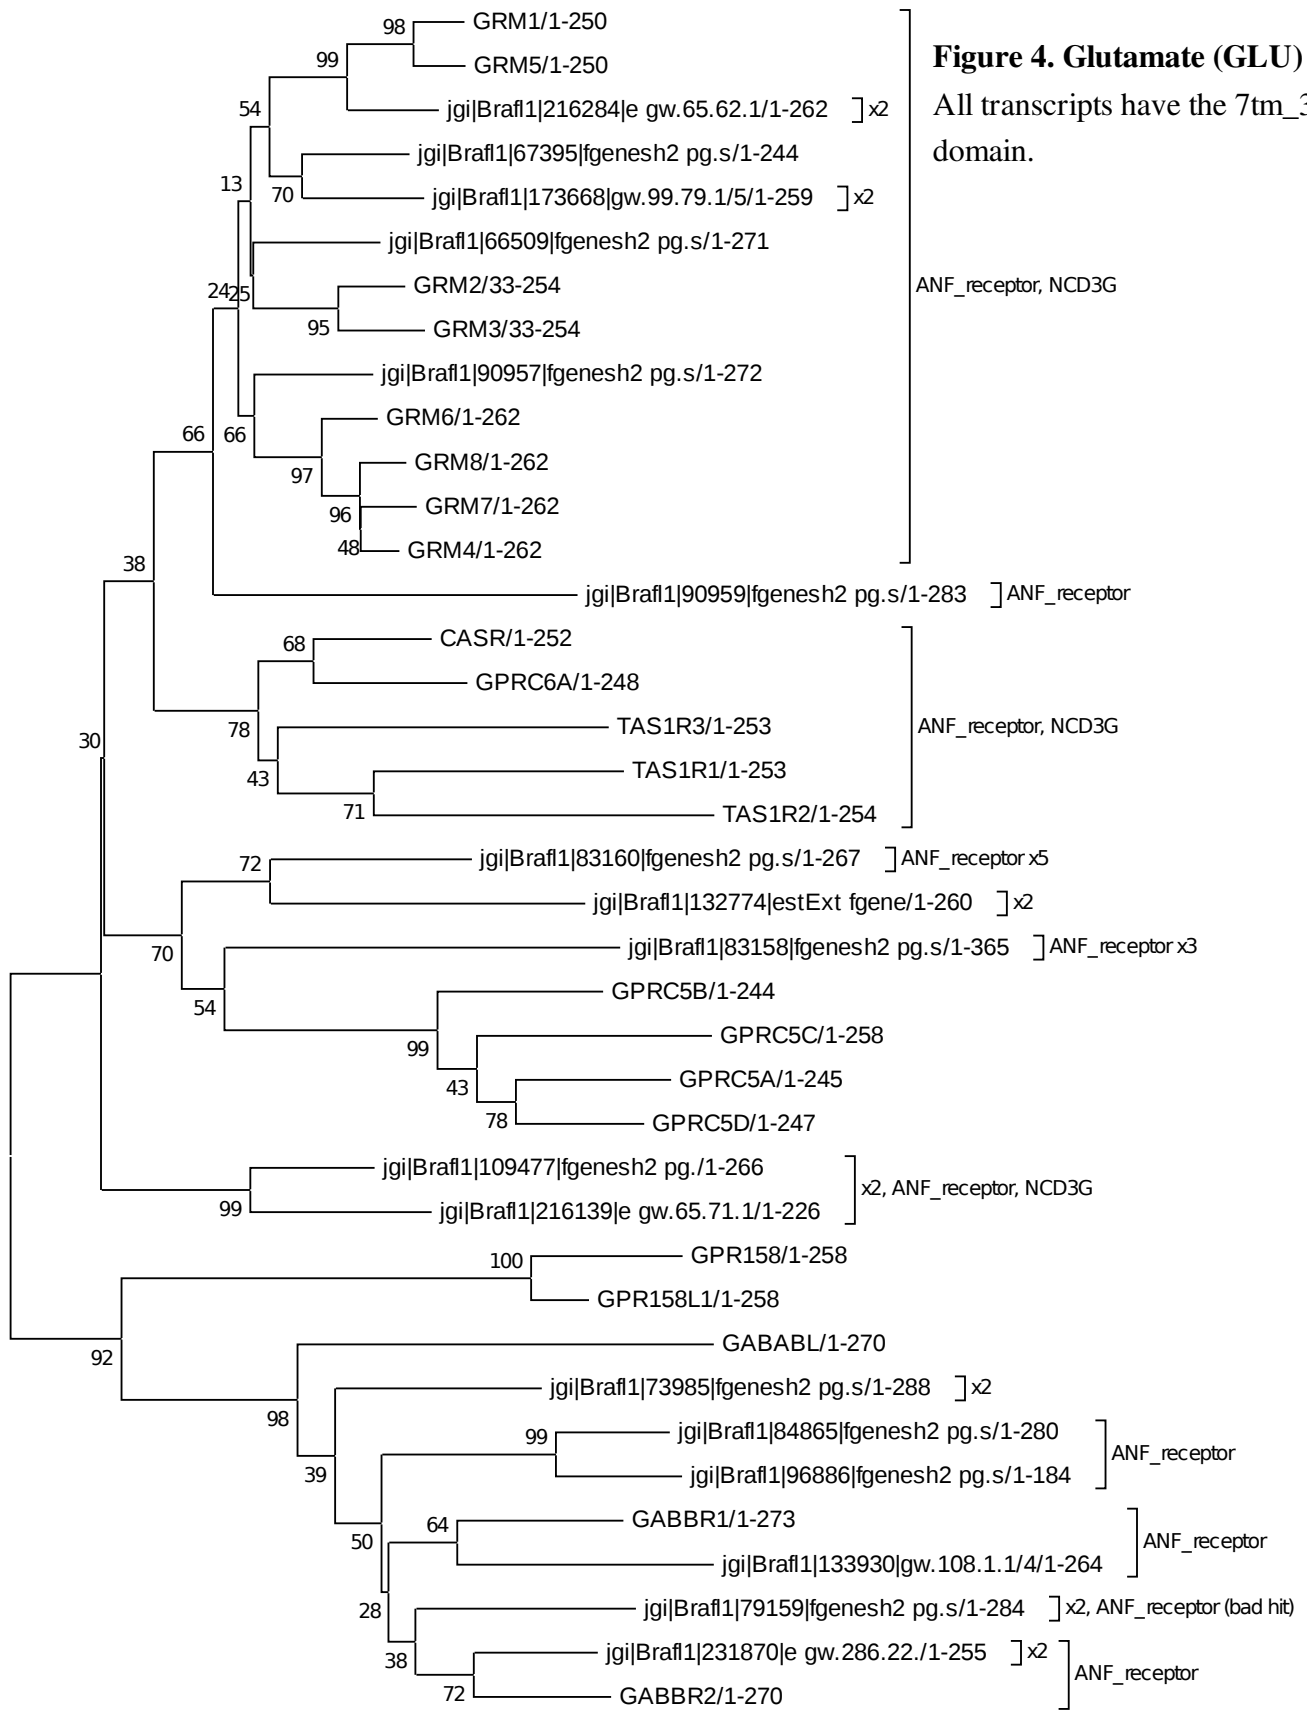

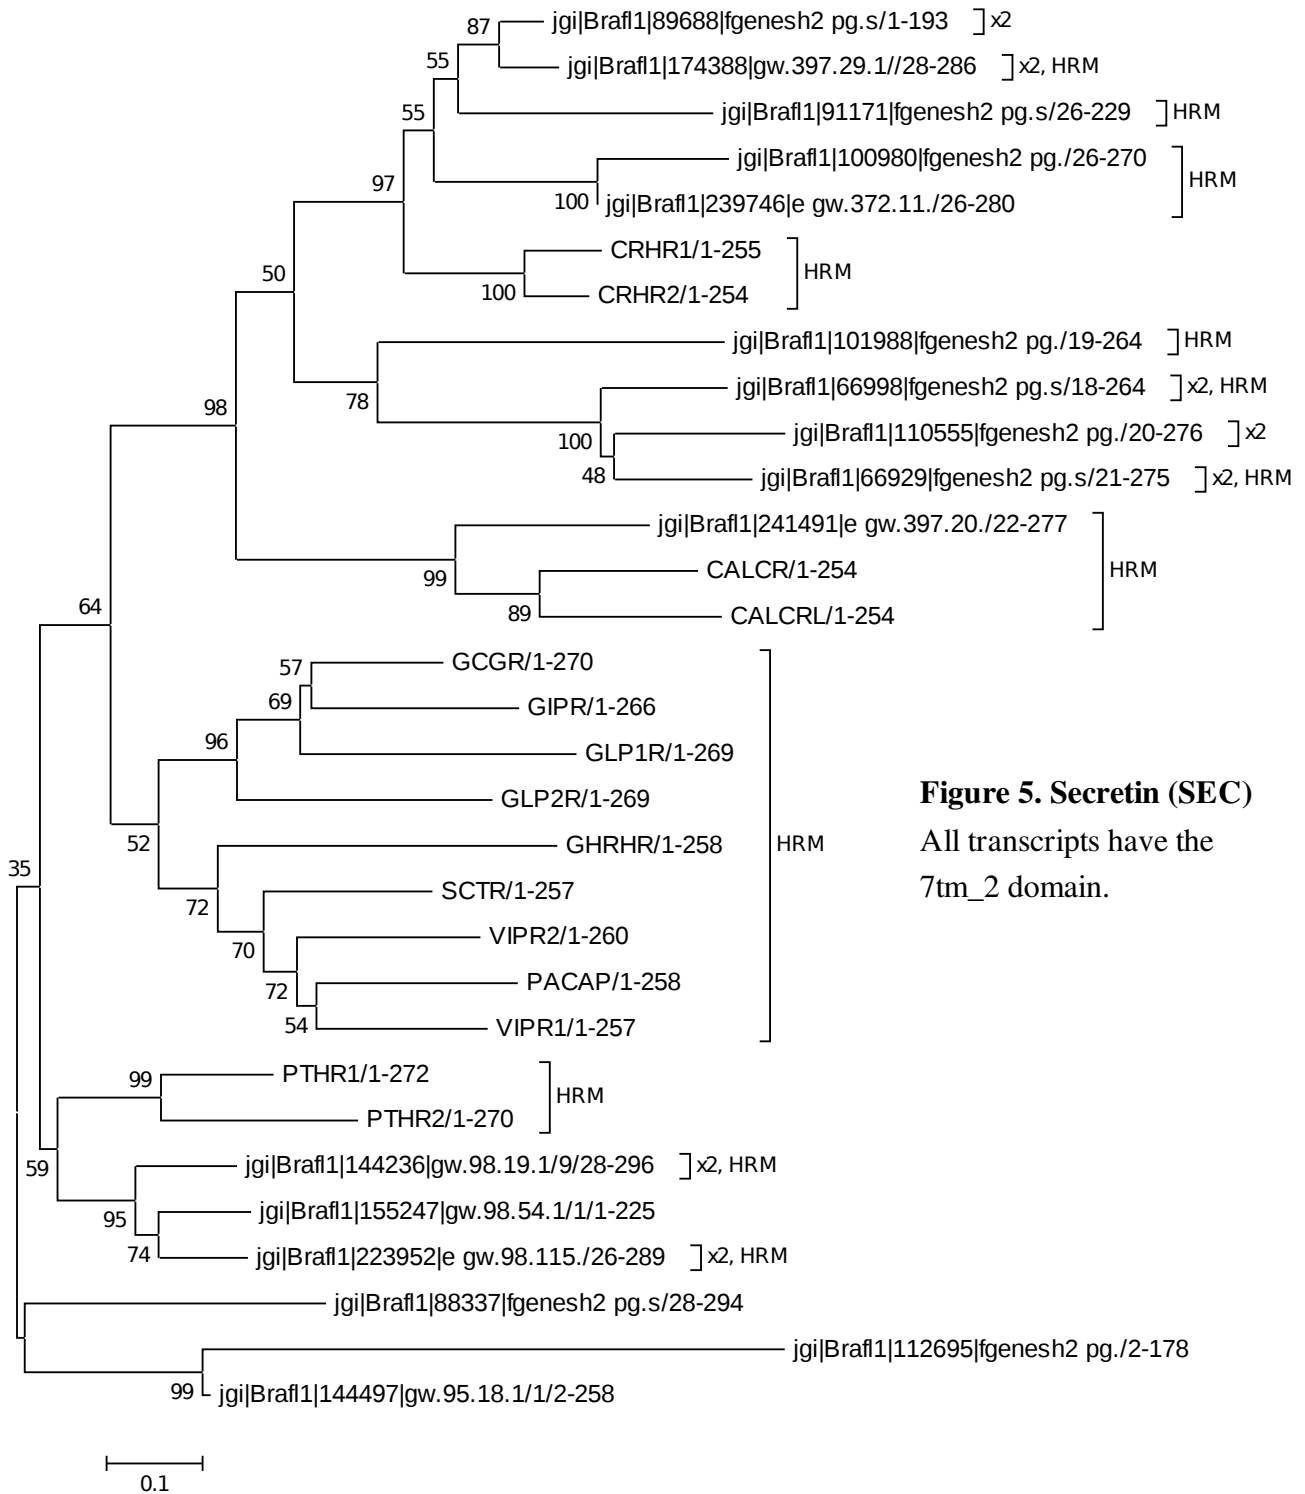

**Figure 5. Secretin (SEC)**

All transcripts have the 7<sup>tm</sup><sub>2</sub> domain.

# Rhodopsin alfa

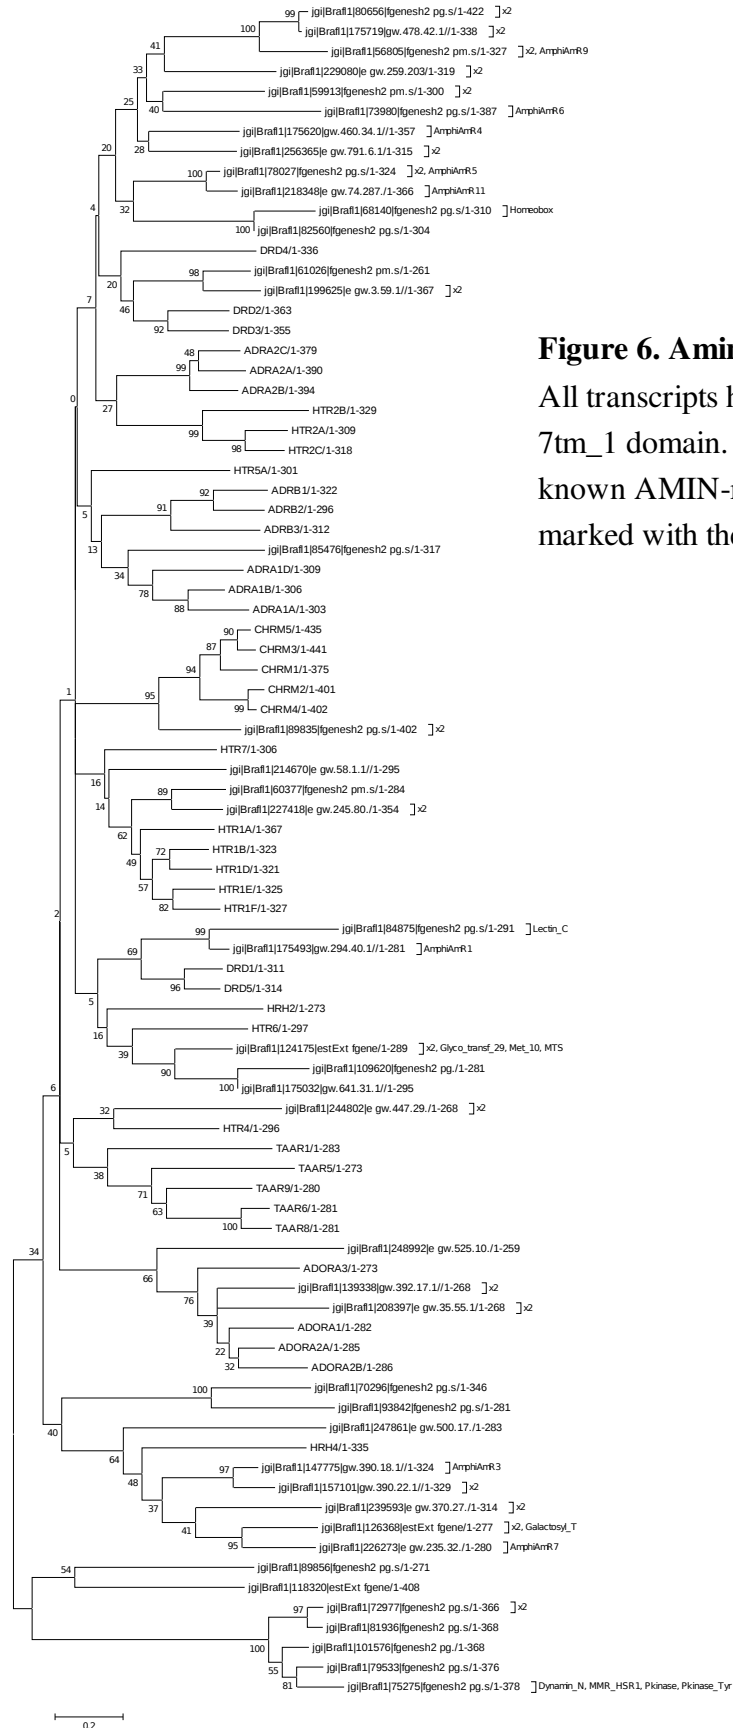

**Figure 6. Amine (AMIN)**  
 All transcripts have the 7tm\_1 domain. Previously known AMIN-receptors are marked with their name.

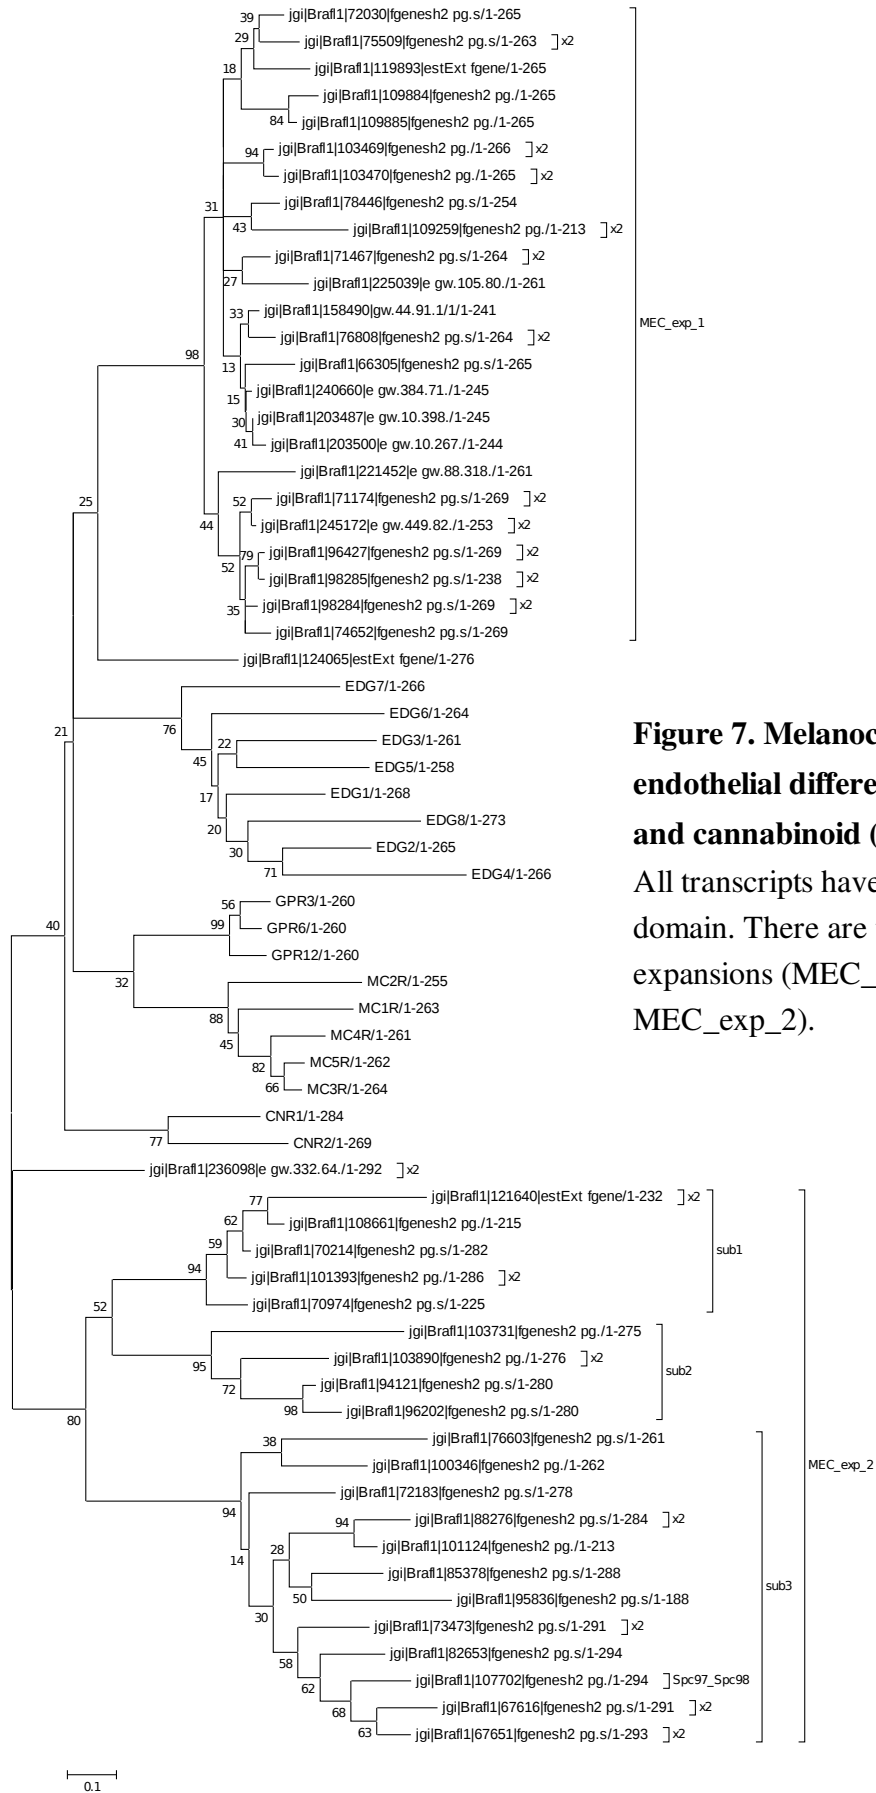

**Figure 7. Melanocortin, endothelial differentiation and cannabinoid (MEC)**

All transcripts have the 7tm\_1 domain. There are two expansions (MEC\_exp\_1 and MEC\_exp\_2).

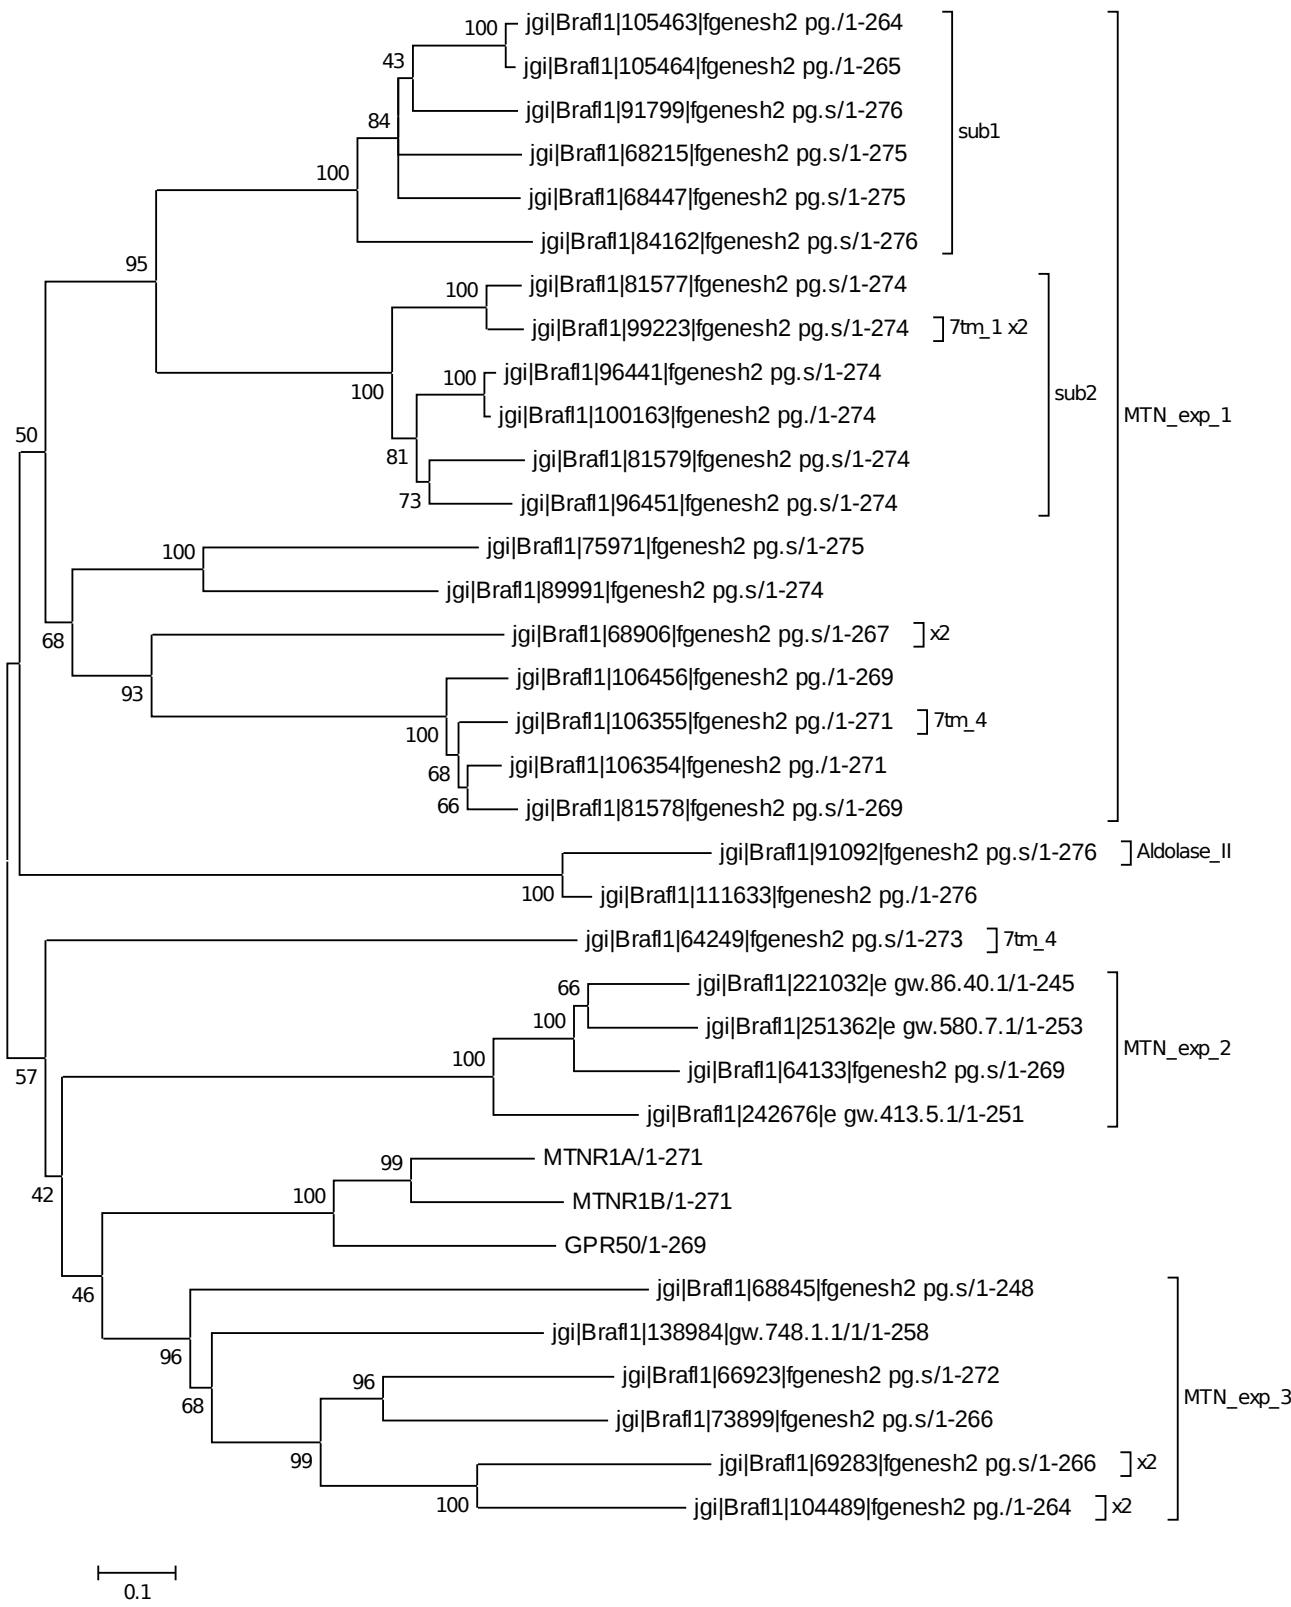

**Figure 8. Melatonin (MTNR)**

All transcripts have the 7tm\_1 domain. There are three expansions (MTN\_exp\_1, MTN\_exp\_2 and MTN\_exp\_3).



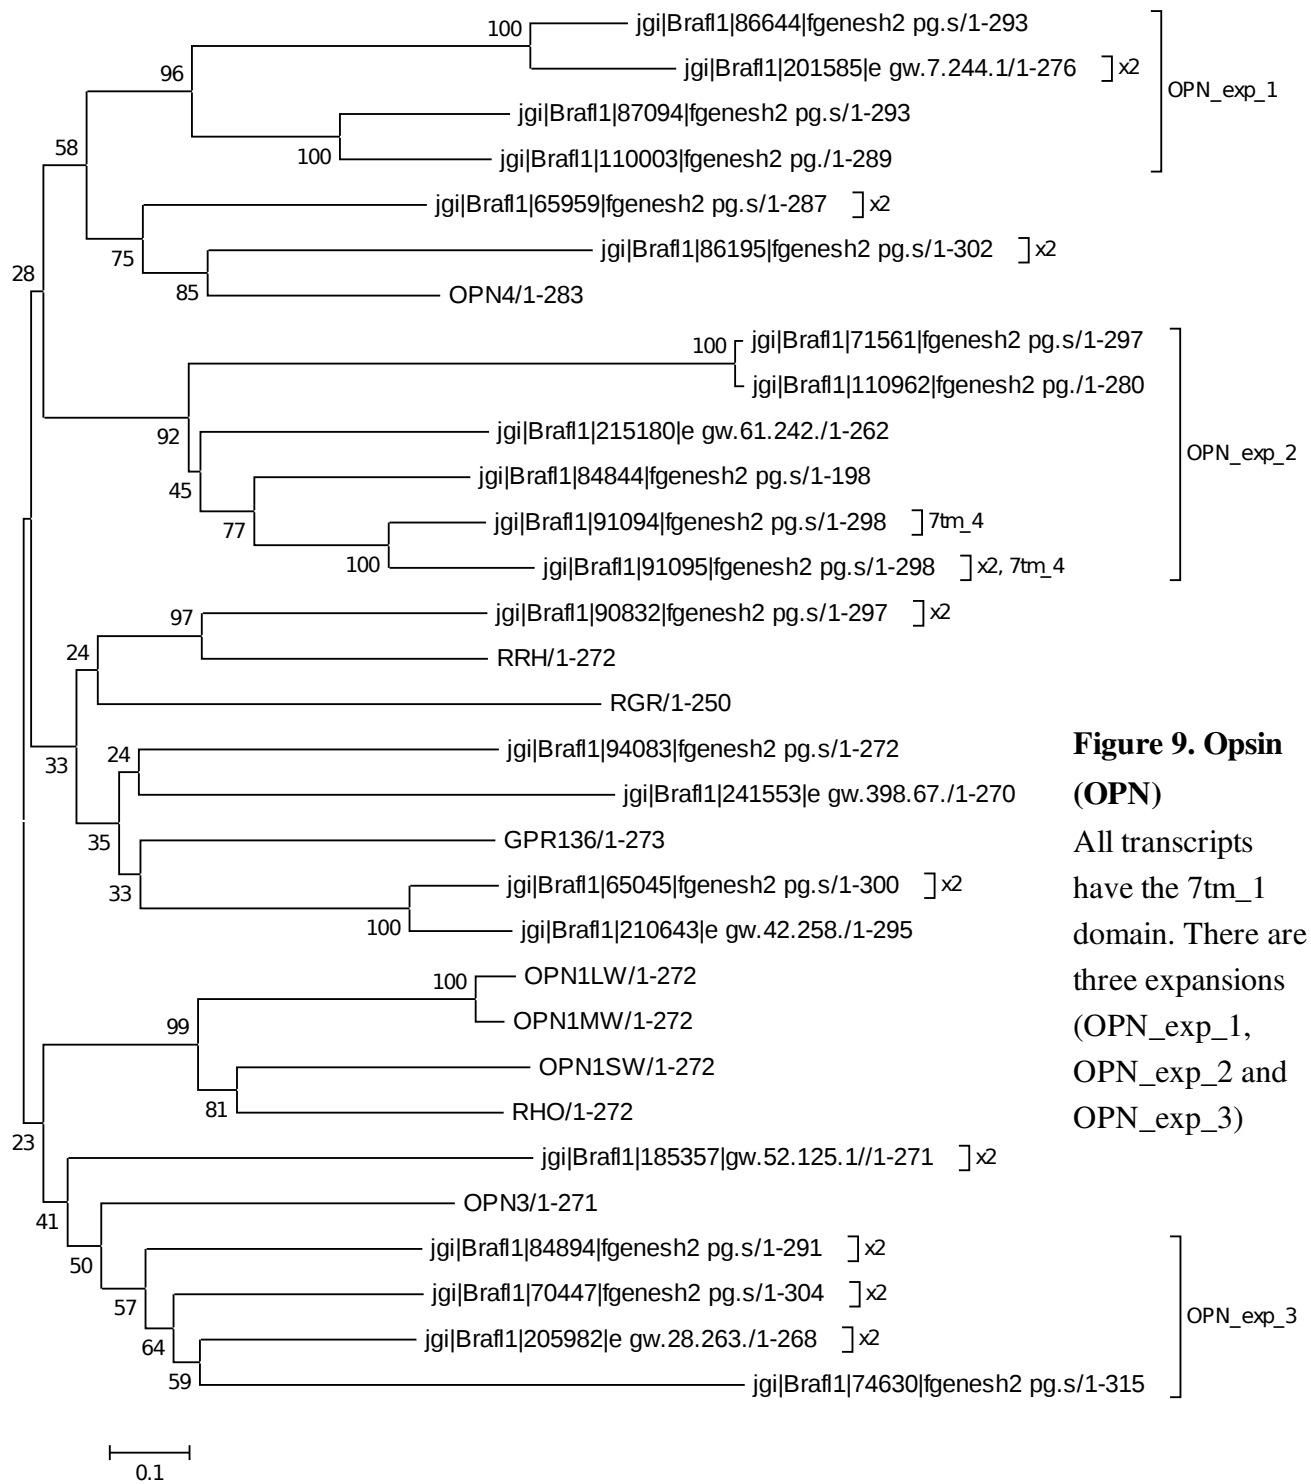

**Figure 9. Opsin (OPN)**

All transcripts have the 7tm\_1 domain. There are three expansions (OPN\_exp\_1, OPN\_exp\_2 and OPN\_exp\_3)

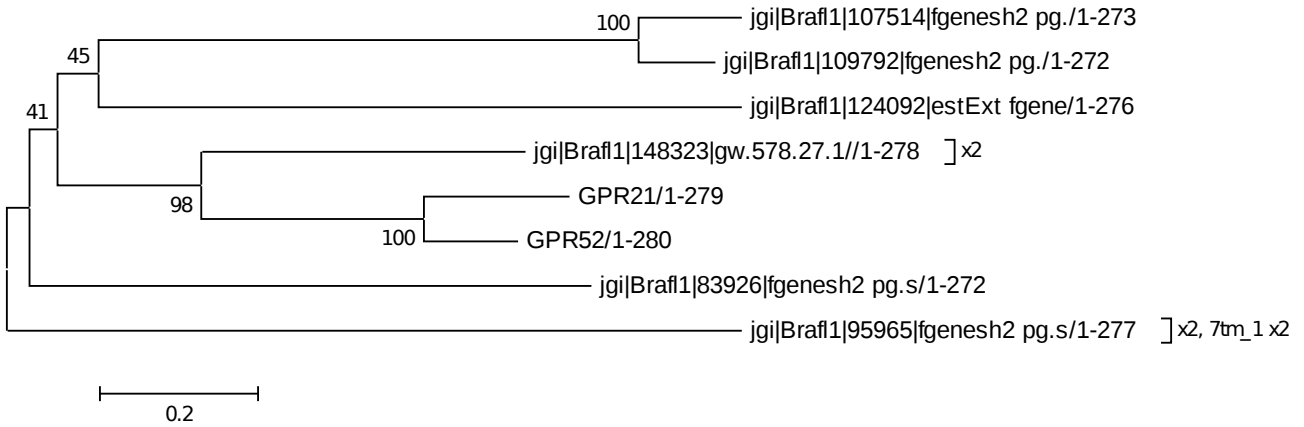

**Figure 10. GPR21-GPR52 (OPN subgroup)**

All transcripts have the 7tm\_1 domian.

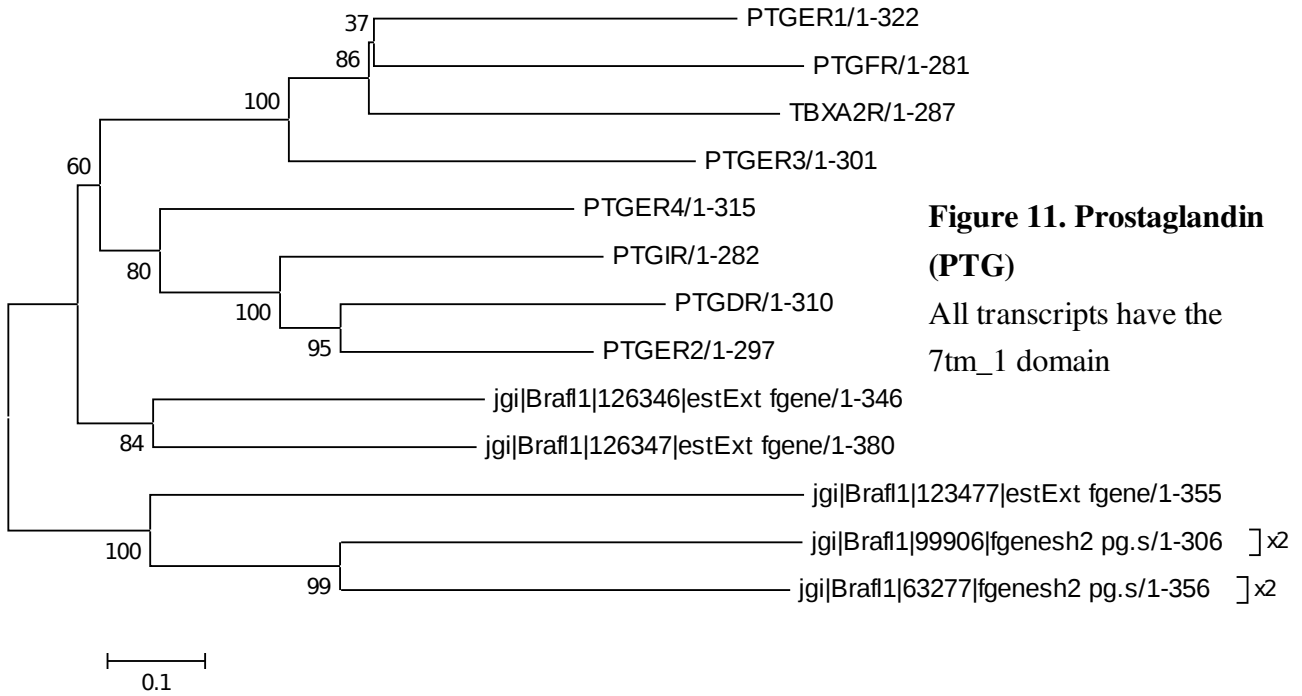

**Figure 11. Prostaglandin (PTG)**

All transcripts have the 7tm\_1 domain

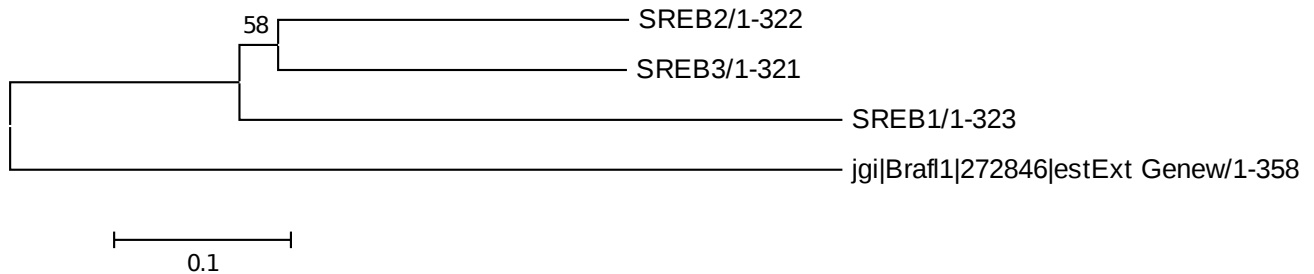

**Figure 12. Super conserved receptor expressed in brain (SREB) (PTG subgroup)**

All transcripts have the 7tm\_1 domain.

# Rhodopsin beta

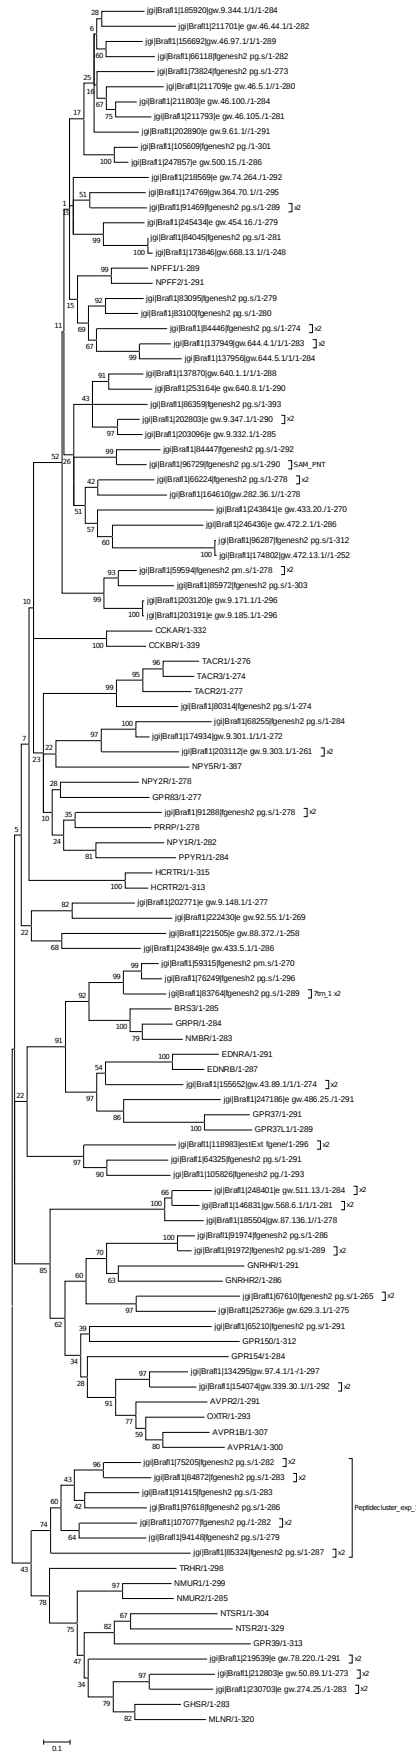

**Figure 13.**  
All transcripts  
have the 7m\_1  
domain.

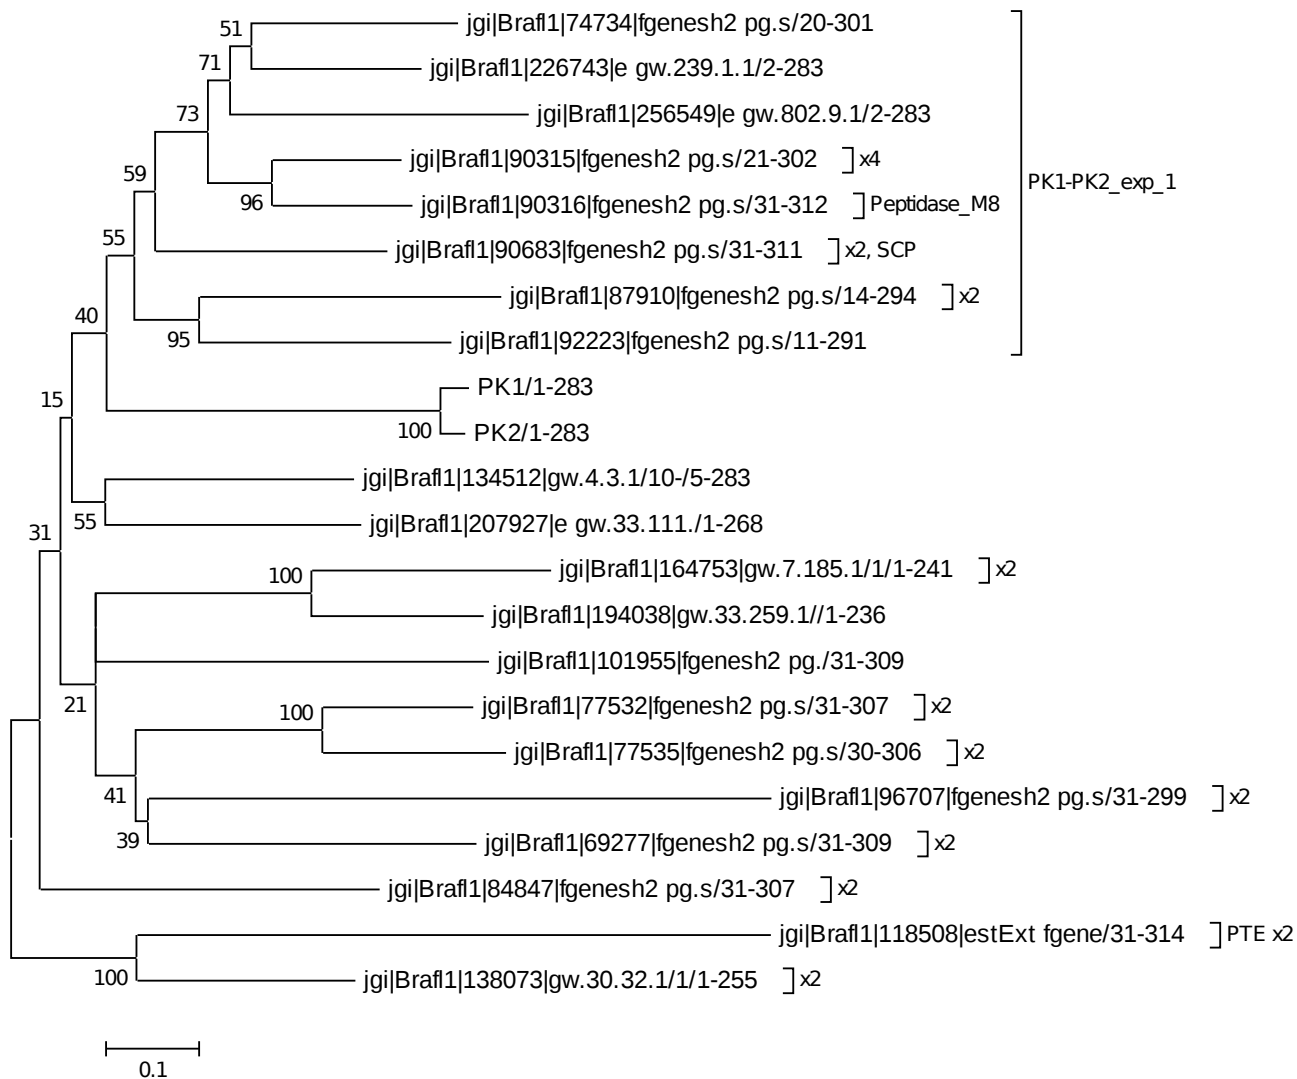

**Figure 14. Prokineticin (PK1-PK2) (beta subgroup)**

All transcripts have the 7<sup>tm</sup>\_1 domain and there is one expansions (PK1-PK2\_exp\_1).

# Rhodopsin gamma

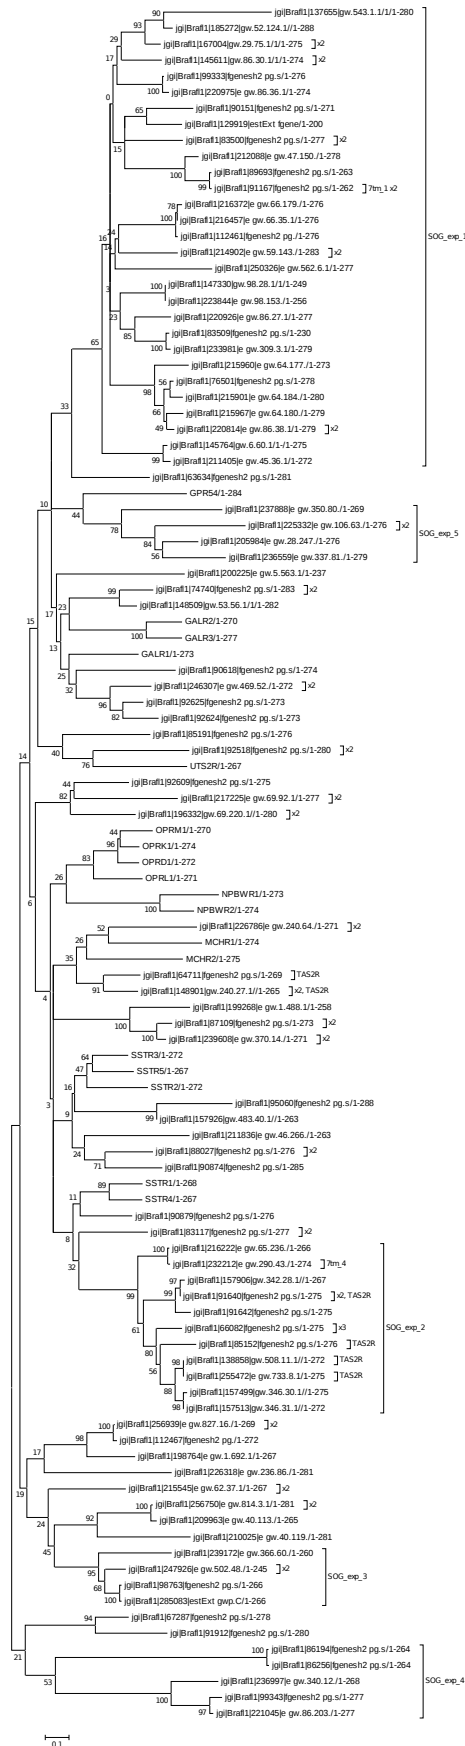

**Figure 15. Somatostatin, opioid and galanin (SOG)**  
All transcripts have 7tm\_1 domain and there is five expansions (SOG\_exp\_1, SOG\_exp\_2, SOG\_exp\_3, SOG\_exp\_4 and SOG\_exp\_5).

## Rhodopsin delta

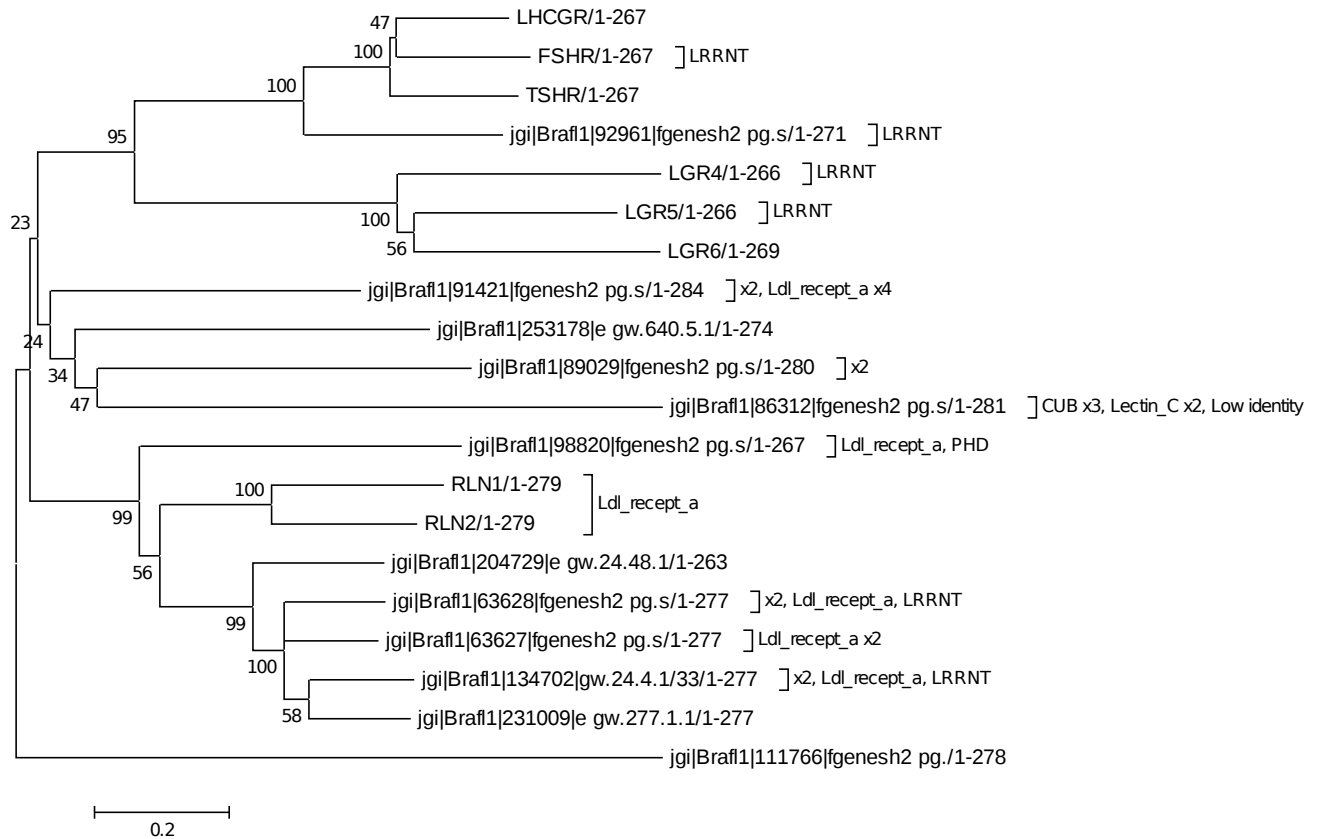

**Figure 16. Glycoprotein and leucine-rich-repeat-containing (GP-LGR)**

All transcripts have the 7<sup>tm</sup>\_1 domain in addition to what is annotated in the tree.
