# Supplementary material for: The amphioxus (Branchiostoma floridae) genome contains a highly diversified set of G protein-coupled receptors
Source: PubMed Central journal article supplement (PMC2246102; doi:10.1186/1471-2148-8-9), 2008-01-16
Supplement: 1471-2148-8-9-S4.pdf [file 1471-2148-8-9-S4.pdf]

#### Additional file 4

We investigated whether GPCRs from different categories such as neuropeptide-, gut peptide- and food intake receptors, were found in amphioxus. For the first two categories, we also scanned for their respective peptide ligands. The first three columns contain information about the receptors. The first column holds the names of groups of receptors, the second tells the type of receptor and the third is a comment on if they are present in amphioxus. The remaining columns are associated with the peptide ligand with name and e-values from the best hit for searches with BLAST and HMM-models, respectively (a cut off at 0.01).

*Table 1.* Neuro peptide receptors.

| Receptor                    | Family/Group | comment                                               | Ligand                          | peptide BLAST | peptide HMM |
|-----------------------------|--------------|-------------------------------------------------------|---------------------------------|---------------|-------------|
| BDKRB1-2                    | chem         | whole family missing                                  | Bradykinin                      |               |             |
| CCKAR, CCKBR                | peptide      | no close Branchiostoma transcript                     | CCK/gastrin                     |               |             |
| CALCR                       | secretin     | one probable ortholog                                 | Calcitonin gene related peptide | 2.00E-005     | 7.50E-006   |
| CRHR                        | secretin     | clusters together with five Branchiostoma transcripts | Corticotropin releasing factor  | 2.00E-003     | 1.90E-005   |
| MCH1                        | ~SOG         | one or three possible orthologs                       | Melanin concentrating hormone   |               |             |
| MC4                         | MEC          | no close Branchiostoma transcript                     | Melanocortin                    | 5.00E-003     | 2.80E-003   |
| NPY1R, NPY2R, NPY5R         | peptide      | possible orthologes                                   | Neuropeptide Y                  | 1.00E-006     | 3.00E-005   |
| OPRD1, OPRK1, OPRL1, OPRM1  | SOG          | no close Branchiostoma transcript                     | Opioid peptides                 | 6.00E-004     | 7.30E-004   |
| HCRTR1-2                    | peptide      | no close Branchiostoma transcript                     | Orexins                         | 3.00E-009     | 5.90E-005   |
| SSTR1-5                     | SOG          | possible orthologes                                   | Somatostatin                    | 2.00E-004     | 1.80E-003   |
| TACR1-3                     | peptide      | one probable ortholog                                 | Tachykinins                     | 6.00E-004     | 7.10E-003   |
| VIPR, PTHR                  | secretin     | no close Branchiostoma transcript                     | VIP, PACAP                      |               |             |
| AVPR1A, AVPR1B, AVPR2, OXTR | peptide      | two possible orthologes                               | Vasopressin/oxytocin            | 1.00E-023     | 1.10E-012   |

Table 2. Gut peptide receptors. This table also contains a column regarding the location of the receptor in human.

| Receptor                              | Target                                  | Family/Group | comment                                                                                               | Ligand                        | peptide BLAST | peptide HMM |
|---------------------------------------|-----------------------------------------|--------------|-------------------------------------------------------------------------------------------------------|-------------------------------|---------------|-------------|
| CCKAR and CCKBR                       | Pancreas, Gallbladder                   | peptide      | no close Branchiostoma transcript                                                                     | Cholecystokinin               |               |             |
| GIPR                                  | Pancreas                                | secretin     | no close Branchiostoma transcript                                                                     | Gastric-inhibitory peptide    |               |             |
| CCKBR                                 | Parietal cells in body of stomach       | peptide      | no close Branchiostoma transcript                                                                     | Gastrin                       |               |             |
| GRPR                                  | G cells in antrum of stomach            | peptide      | Clusters together with BRS3 and NMBR which in turn goes together with three Branchiostoma transcripts | Gastrin-releasing peptide     |               |             |
| GLP1R and GLP2R                       | Liver                                   | secretin     | no close Branchiostoma transcript                                                                     | Glucagon                      | 4.00E-002     | 2.10E-003   |
| Guanlyl cyclase receptor - not a GPCR | Small and large intestine               |              |                                                                                                       | Guanylin                      | 6.60E-001     | 9.10E-003   |
| MLNR                                  | Esophageal sphincter, Stomach, Duodenum | peptide      | cluster together with GHSR and two Branchiostoma transcripts                                          | Motilin                       | 1.70E-001     | 8.20E-004   |
| NTSR                                  | Intestinal smooth muscle                | peptide      | also in the same cluster as MLNR, but more basal                                                      | Neurotensin                   |               | 6.30E-003   |
| NPY1R, NPY2R and NPY5R                | Stomach, Pancreas                       | peptide      | possible orthologes                                                                                   | Peptide YY                    | 8.00E-007     | 1.40E-005   |
| SCTR                                  | Pancreas, Stomach                       | secretin     | no close Branchiostoma transcript                                                                     | Secretin                      | 3.90E-002     | 4.20E-004   |
| SSTR 1-5                              | Stomach, Intestine, Pancreas, Liver     | SOG          | possible orthologes                                                                                   | Somatostatin                  | 2.00E-004     | 1.80E-003   |
| TAC1-3                                | Enteric neurons                         | peptide      | one probable ortholog                                                                                 | Substance P                   | 6.00E-004     | 7.10E-003   |
| VIPR1 and VIPR2                       | Small intestine, Pancreas               | secretin     | no close Branchiostoma transcript                                                                     | Vasoactive intestinal peptide |               |             |

Table 3. Food intake regulating receptors

| Name           | GPCR class             | comment                                         | Ligand                                 |
|----------------|------------------------|-------------------------------------------------|----------------------------------------|
| MC4R           | Rhodopsin, alpha group | No obvious ortholog                             | $\alpha$ -, $\beta$ -MSH, Agrp         |
| MC3R           | Rhodopsin, alpha group | No obvious ortholog                             | $\alpha$ -, $\beta$ -MSH, Agrp         |
| CNR1           | Rhodopsin, alpha group | No obvious ortholog                             | Anandamide/cannabinoids                |
| HTR1B          | Rhodopsin, alpha group | In a cluster with two BF transcripts            | Serotonin                              |
| HTR2C          | Rhodopsin, alpha group | No obvious ortholog                             | Serotonin                              |
| HTR6           | Rhodopsin, alpha group | In a cluster with three BF transcripts          | Serotonin                              |
| ADRA1B         | Rhodopsin, alpha group | In a cluster with one BF transcript             | Adrenaline                             |
| ADRA2B         | Rhodopsin, alpha group | In a cluster with one BF transcript             | Adrenaline                             |
| ADRB1          | Rhodopsin, alpha group | In a cluster with one BF transcript             | Noradrenaline                          |
| ADRB2          | Rhodopsin, alpha group | In a cluster with one BF transcript             | Adrenaline                             |
| ADRB3          | Rhodopsin, alpha group | In a cluster with one BF transcript             | Adrenaline                             |
| CHRM3          | Rhodopsin, alpha group | In a cluster with one BF transcript             | Acetylcholine                          |
| DRD2           | Rhodopsin, alpha group | In a cluster with two BF transcripts            | Dopamine                               |
| DRD3           | Rhodopsin, alpha group | In a cluster with two BF transcripts            | Dopamine                               |
| H3             | Rhodopsin, alpha group | Missing in dataset                              | Histamine                              |
| NPY Y1R        | Rhodopsin, beta group  | In a cluster with one BF transcript             | NPY                                    |
| NPY Y2R        | Rhodopsin, beta group  | In a cluster with one BF transcript             | NPY, PYY <sub>3-36</sub>               |
| NPY Y5R        | Rhodopsin, beta group  | In a cluster with three BF transcripts          | NPY                                    |
| PRRPR (GPR10)  | Rhodopsin, beta group  | In a cluster with one BF transcript             | PRP                                    |
| GHSR           | Rhodopsin, beta group  | In a cluster with two BF transcripts            | Ghrelin                                |
| ORXR1 (HCRTR1) | Rhodopsin, beta group  | No obvious ortholog                             | Orexin A/B                             |
| ORXR2 (HCRTR1) | Rhodopsin, beta group  | No obvious ortholog                             | Orexin A/B                             |
| NPFF1R         | Rhodopsin, beta group  | In a cluster with five BF transcripts           | Neuropeptide FF                        |
| NPFF2R         | Rhodopsin, beta group  | In a cluster with five BF transcripts           | Neuropeptide FF                        |
| NMU1R          | Rhodopsin, beta group  | Basal to a cluster holding three BF transcripts | Neuromedin U                           |
| NMU2R          | Rhodopsin, beta group  | Basal to a cluster holding three BF transcripts | Neuromedin U                           |
| CCK1R (CCKRA)  | Rhodopsin, beta group  | No obvious ortholog                             | CCK                                    |
| CCK2R (CCKRA)  | Rhodopsin, beta group  | No obvious ortholog                             | CCK, Gastrin                           |
| BRS3           | Rhodopsin, beta group  | In a cluster with three BF transcripts          | -                                      |
| MCH1R (GPR24)  | Rhodopsin, gamma group | In a cluster with one BF transcript             | MCH                                    |
| GPR7           | Rhodopsin, gamma group | No obvious ortholog                             | Neuropeptide W/B                       |
| GALR1          | Rhodopsin, gamma group | In a cluster with four BF transcripts           | Galanin                                |
| GALR2          | Rhodopsin, gamma group | In a cluster with two BF transcripts            | Galanin                                |
| GALR3          | Rhodopsin, gamma group | In a cluster with two BF transcripts            | Galanin/GALP                           |
| OPRM1          | Rhodopsin, gamma group | No obvious ortholog                             | $\beta$ -endorphin                     |
| OPRK1          | Rhodopsin, gamma group | No obvious ortholog                             | Dynorphin                              |
| FFA1R, (GPR40) | Rhodopsin, gamma group |                                                 | Medium and long chain carboxylic acids |
| FFA3R, (GPR41) | Rhodopsin, gamma group |                                                 | Short chain fatty acids                |
| FSHR           | Rhodopsin, delta group | In a cluster with one BF transcript             | FSH                                    |
| TRHR           | Rhodopsin, delta group | Whole cluster missing                           | TRH                                    |
| GCGR           | Secretin               | No obvious ortholog                             | Glucagon                               |
| GLP1R          | Secretin               | No obvious ortholog                             | GLP                                    |
| CRH1R (CRF1R)  | Secretin               | In a cluster with five BF transcripts           | CRH, Urocortin                         |
| CRH2R (CRF2R)  | Secretin               | In a cluster with five BF transcripts           | Urocortin                              |
